1 **The contribution of object size, manipulability, and stability on neural responses to**  
2 **inanimate objects**

3

4

5 **Caterina Magri<sup>a,1\*</sup>, Talia Konkle<sup>b</sup> and Alfonso Caramazza<sup>b,c</sup>**

6

7 <sup>a</sup> Department of Psychology, Harvard University, Cambridge, MA 02138, USA

8 <sup>b</sup> Department of Psychology, Harvard University, Cambridge, MA 02138, USA

9 <sup>c</sup> Center for Mind/Brain Sciences (CIMEC), University of Trento, 38068 Rovereto (TN), Italy

10 <sup>1</sup> Department of Cognitive Science, Johns Hopkins University, Baltimore, MD 21218

11

12

13

14 *\*Corresponding author.* Department of Cognitive Science, 247 Krieger Hall, 3400 N. Charles  
15 Street, Baltimore, MD 21218, USA. Email address: [cmagri1@jhu.edu](mailto:cmagri1@jhu.edu).

16

17

18

19

## 20 **Abstract**

21 In human occipitotemporal cortex, brain responses to depicted inanimate objects have a large-  
22 scale organization by real-world object size. Critically, the size of objects in the world is  
23 systematically related to behaviorally-relevant properties: small objects are often grasped and  
24 manipulated (e.g., forks), while large objects tend to be less motor-relevant (e.g., tables), though  
25 this relationship does not always have to be true (e.g., picture frames and wheelbarrows). To  
26 determine how these two dimensions interact, we measured brain activity with functional  
27 magnetic resonance imaging while participants viewed a stimulus set of small and large objects  
28 with either low or high motor-relevance. The results revealed that the size organization was  
29 evident for objects with both low and high motor-relevance; further, a motor-relevance map was  
30 also evident across both large and small objects. Targeted contrasts revealed that typical  
31 combinations (small motor-relevant vs. large non-motor-relevant) yielded more robust  
32 topographies than the atypical covariance contrast (small non-motor-relevant vs. large motor-  
33 relevant). In subsequent exploratory analyses, a factor analysis revealed that the construct of  
34 motor-relevance was better explained by two underlying factors: one more related to  
35 manipulability, and the other to whether an object moves or is stable. The factor related to  
36 manipulability better explained responses in lateral small-object preferring regions, while the  
37 factor related to object stability (lack of movement) better explained responses in ventromedial  
38 large-object preferring regions. Taken together, these results reveal that the structure of neural  
39 responses to objects of different sizes further reflect behavior-relevant properties of  
40 manipulability and stability, and contribute to a deeper understanding of some of the factors that  
41 help the large-scale organization of object representation in high-level visual cortex.

42

43

44

45

46

47

48

49

50

51 **Highlights**

52 - Examined the relationship between real-world size and motor-relevant properties in the  
53 structure of responses to inanimate objects.

54 - Large scale topography was more robust for contrast that followed natural covariance of small  
55 motor-relevant vs. large non-motor-relevant, over contrast that went against natural covariance.

56 - Factor analysis revealed that manipulability and stability were, respectively, better explanatory  
57 predictors of responses in small- and large-object regions.

58

59

60

61 **Keywords**

62 object representation; occipitotemporal cortex; functional magnetic resonance imaging, real-world  
63 size

64

## 65 1. Introduction

66 To recognize objects in the real world, large portions of the brain are utilized, including  
67 the ventral visual stream (Goodale and Milner, 1992; Ishai et al., 1999). Within this cortex there  
68 is a highly consistent organization of neural response tuning, with a tripartite large-scale  
69 topography distinguishing responses to animate entities, large inanimate objects, and small  
70 inanimate objects (Chao et al., 1999; Konkle and Caramazza, 2013; Proklova et al., 2016; Julian  
71 et al., 2017; Grill-Spector and Weiner, 2014). Some proposals have raised the possibility that the  
72 large-scale divisions in this cortex arise to support different behavioral needs (e.g., manipulating  
73 objects vs navigating in environments), linked to distinct underlying long-range brain networks  
74 (e.g., Mahon and Caramazza, 2011; Konkle and Caramazza, 2017). Thus, in the present work we  
75 examined how both the size of an object and its motor-relevance can explain brain responses to  
76 object categories.

77  
78 Intuitively, the relationship between an object's size and the degree of interaction it affords  
79 in the world is evident: small objects tend to be graspable and easy to hold up, while larger objects  
80 tend to be used as support or for navigation. However, other relationships are possible, including  
81 not usually manipulated small objects like picture frames, and interactive large objects like pianos.  
82 Here, we operationalize the dimension dealing with object interaction as *motor-relevance*. While  
83 similar conceptually to the property of manipulability that has been investigated in the past  
84 (Kellenbach et al., 2003; Boronat et al., 2003; Mahon et al., 2007; Campanella et al., 2010;  
85 Kalénine and Buxbaum, 2016), motor-relevance spans a wider definition in that it includes actions  
86 performed not only with the hands, but with other parts of the body as well. With this broader  
87 conceptualization, size can more easily dissociate from degree of interaction: large objects like  
88 swing sets and wheelbarrows tend to involve movements beyond hand-performed actions, while  
89 for small objects such as picture frames and smoke alarms there is no clear motor interaction  
90 associated.

91  
92 To date, there is substantial evidence that motor-relevance is an important construct for  
93 visual object responses, particularly along the lateral aspect of the occipitotemporal cortex, a  
94 region known to show a preference for small inanimate over large inanimate objects (Konkle and  
95 Oliva, 2012; Konkle and Caramazza, 2013). For example, in this territory, there is a region with

96 preference for tools (Chao et al., 1999; Bracci et al., 2012; Gallivan et al., 2013; Chen et al., 2016)  
97 which is closely overlapping with effector-specific regions (Bracci et al., 2012), and persists in the  
98 congenitally blind (Peelen et al., 2013; Wang et al., 2015). Further, this cortex shows connectivity  
99 with frontoparietal networks supporting actions (Simmons and Martin, 2012; Bi et al., 2015;  
100 Konkle and Caramazza, 2017), and is causally involved in tool-action discrimination judgments  
101 (Perini et al., 2014). While past studies have typically focused on objects that require hand-  
102 performed actions, the present study allows us to test whether the inclusion of non-hand-performed  
103 actions through the motor-relevance dimension would further explain neural responses and extend  
104 them to large objects.

105

106 In the ventromedial temporal cortex, another tool-preferring region has been observed by  
107 some studies in the medial fusiform gyrus when contrasting tools to animals (Chao et al., 1999;  
108 Whatmough et al., 2002; Mahon et al., 2007; Garcea and Mahon 2014). However, the property  
109 of motor-relevance in this region is less clear: for example, responses to manipulable tools are  
110 not higher than to other inanimate objects (Mahon et al., 2007; Chen et al., 2018), though there is  
111 still some evidence for sensitivity to tools in neural adaptation signals (Mahon et al., 2007).  
112 Further, research focused on scene understanding has characterized these ventral-medial object  
113 responses along other kinds of object properties that are less related to motor-relevance. For  
114 example, responses in ventromedial scene-related regions are best predicted by objects invoking  
115 a local space that tend to stay fixed in the world, and are useful as a landmark (Troiani et al.,  
116 2014, Mullally and Maguire, 2011; Julian et al., 2016; Auger et al., 2013; see also Epstein,  
117 2014). These same areas are also known to show a preference for large over small inanimate  
118 objects (Konkle and Oliva, 2012; Konkle and Caramazza, 2013) and, interestingly, also to the  
119 names of such objects in both blind and sighted individuals (He et al., 2013).

120

121 Given these past observations, in the present study we aimed to clarify how brain responses  
122 to different objects in occipitotemporal cortex reflect motor-relevance and object size properties.  
123 To do so, we designed our experiment to enable two different levels of granularity. First, we  
124 compared the broad relationship among object size and motor-relevance properties along a 2x2  
125 design (large vs small, motor-relevant vs non-motor relevant), finding effects for both variables  
126 independently. Second, we examined brain responses at the level of object categories (72

127 categories total), where a factor analysis revealed that three dimensions that respectively relate to  
128 object size, manipulability, and stability interact to account for the structure of brain responses in  
129 different regions. Finally, we consider the relative merits of visual feature- versus domain-based  
130 properties (e.g., manipulability, navigation relevance) as driving principles in the organization of  
131 high-level visual cortex.

## 132 2. METHODS

### 133 2.1 Participants

134 For the fMRI experiment, 21 healthy adults with normal or corrected-to-normal vision participated  
135 in a 2-hour fMRI session (age, 18-30 years; 11 females). Three were later removed for excessive  
136 head movement, and the remaining 18 subjects were analyzed. Each subject gave informed consent  
137 according to procedures approved by the Institutional Review Board at the University of Trento.

138

139 For the online behavioral experiments, ratings were collected from 644 total participants  
140 (464 subjects for the stimulus set development and validation over the dimensions of motor-  
141 relevance [n=161], size [n=168] and recognition [n=135]; and 36 subjects for each of the  
142 dimensions of manipulability, spatial definition, position variability, motion-based identity and  
143 interaction envelope).

144

### 145 2.2 Stimuli.

146 The stimulus set consisted of images from 72 object categories, where each object category  
147 belonged to one of four conditions (small motor-relevant, small non-motor-relevant, large motor-  
148 relevant and large non-motor-relevant) with 18 object categories per condition. Each object  
149 category included images of six exemplars of that category, for a total of 432 pictures in the  
150 stimulus set (Figure 1a). Each image depicted an isolated object on a white background, and the  
151 image was sized to 512 x 512 pixels with the object's longest axis reaching the border of the image.

152

153 **2.2.1 Stimuli validation.** To develop and validate the stimulus set, we performed three separate  
154 behavioral studies using Amazon Mechanical Turk on an initial larger set of 20 object categories  
155 per condition with 7 unique exemplars for each object category (560 total images). Our aim was  
156 to construct a stimulus set in which items were recognizable, and where the size and motor-  
157 relevance dimensions were balanced.

158

159 *a. Recognition ratings.* Observers were presented with an item and reported whether they were  
160 familiar with this object (yes/no), and how easily they recognized the object on a scale from  
161 1 (very hard to recognize) to 5 (very easy to recognize).

162 *b. Motor-relevance ratings.* Participants were presented with an item and rated the degree to

163 which the object made them think of moving their hands or other parts of their body, using  
164 a scale from 1 (not at all) to 7 (very strongly).

165 *c. Size Ratings.* Participants were presented with an item and judged the size of an object as  
166 they would encounter it in everyday life, on a scale from 1 to 7. To provide a reference for  
167 the scale, pictures of a wristwatch (small size), a hiking backpack (medium size) and a bed  
168 (large size) were provided beside the values of 1, 4 and 7 on the scale.

169  
170 For all three experiments, each participant made judgments for 20 items (5 items from each  
171 of the four conditions). Only one exemplar for an object category was presented to each participant.  
172 Ratings were obtained for all 560 objects combining data from all participants, so that each image  
173 was rated by 6 observers along the measures of size and motor-relevance and by five observers  
174 along the measure of recognition.

175  
176 In order to eliminate those items that were least recognizable, we dropped one item from  
177 each object category based on the familiarity score in the recognition experiment. We next  
178 eliminated two object categories that scored low in familiarity in order to balance the ratings from  
179 the other two experiments (Motor-relevance and Size experiments). This resulted in a new stimulus  
180 set with 18 objects per condition (72 total) and 6 items per object. All results and analysis that  
181 follow refer to this new stimulus set.

182  
183 To ensure these factors were balanced, we conducted several statistical tests. As expected,  
184 motor-relevant objects had higher motor-relevance scores than non-motor-relevant objects  
185 ( $t_{35}=32.93$ ,  $p<0.001$ ), and large objects had higher size ratings than small objects ( $t_{35}=19.82$ ,  
186  $p<0.001$ ). Further, large and small objects did not differ in their average motor-relevance scores  
187 ( $t_{35}=1.63$ ,  $p=0.11$ ). The same was true when looking separately at large motor-relevant and small  
188 motor-relevant objects ( $t_{17}=1.05$ ,  $p=0.31$ ), and small non-motor-relevant and large non-motor-  
189 relevant object categories ( $t_{35}=1.35$ ,  $p=0.2$ ). Similarly, motor-relevant and non-motor-relevant  
190 objects did not differ in their average size score ( $t_{35}=-0.72$ ,  $p=0.5$ ) and neither did large motor-  
191 relevant and large non-motor-relevant relevant objects ( $t_{17}=0.96$ ,  $p=0.35$ ), nor small motor-  
192 relevant and small non-motor-relevant objects ( $t_{17}=-1.76$ ,  $p=0.1$ ).

193



## 194 2.3 Image Acquisition.

195 Imaging data were acquired using a BioSpin MedSpec 4T scanner (Bruker) with an eight-channel  
196 coil. Functional data were obtained with an echo-planar 2D imaging sequence (repetition time TR:  
197 2000ms; echo time TE: 33ms; flip angle: 73°; slice thickness: 3 mm; gap: 0.99 mm, with 3x3 in-  
198 plane resolution and 34 slices). Volumes were acquired in ascending interleaved order of slice  
199 acquisition.

200

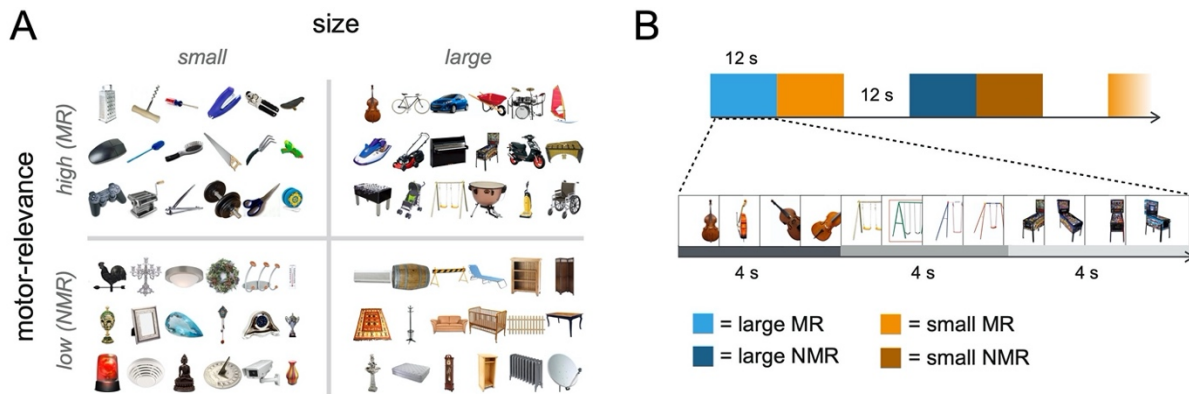

201

202 [2 column fitting]

203 **Figure 1.** a) Stimulus set: 72 inanimate object categories divided into four conditions (small  
204 motor-relevant, small non-motor-relevant, large motor-relevant, large non-motor-relevant). Each  
205 object category included six individual items, for a total of 432 individual images. b) fMRI task:  
206 subjects were presented with four consecutive pictures of the same object category in a 4s object  
207 category mini-block. Three 4s category-level mini-blocks (e.g. cello mini-block, swing set mini-  
208 block, pinball machine mini-block) were presented sequentially in a 12s condition-level main block  
209 (e.g. large motor-relevant objects block). The task for participants was to detect when a red frame  
210 surrounded one of the objects, which happened once per 12s block.

211

212

## 213 **2.4 Experimental Design and Statistical Analysis**

214 **2.4.1 Design and procedure.** During the fMRI experiment subjects viewed images of the small  
215 motor-relevant, small non-motor-relevant, large motor-relevant, large non-motor-relevant objects  
216 in a classic blocked design. In each run, stimuli from each of the 4 conditions were presented 6  
217 times in 12s stimulus blocks, with 6 rest blocks of 12s interspersed. Images were each presented  
218 for 800ms with a 200ms blank between each stimulus. Fixation blocks also appeared at the  
219 beginning and end of each run, for 4 and 12 seconds respectively. Participants were instructed to  
220 maintain fixation and to press a button when a red frame surrounded one of the objects, which  
221 happened once per block. The full experiment consisted of six runs each lasting 6 minutes and 12  
222 seconds.

223 Additionally, we added sub-structure in each stimulus block, to support more exploratory  
224 analyses about the relationship between all 72 object categories (see Figure 1b). Specifically, each  
225 stimulus block was comprised of 4s mini-blocks. In each mini-block, three different exemplars  
226 from the same category were shown. For example, in a 12s block of large motor-relevant objects,  
227 a participant would see 4 different cellos, followed by 4 different swings, followed by 4 different  
228 pinball machines. Within each run all 72 object categories were presented exactly one time. The  
229 specific 4 exemplars that were displayed in each mini-block were randomly chosen without  
230 repetition from the set of 6 possible exemplars from that object category.

231 Each image was presented in isolation at a  $\sim 8 \times \sim 8^\circ$  visual angle. Stimulus presentation was  
232 performed using the Psychophysics Toolbox package (Brainard, 1997) in MATLAB.

233

234 **2.4.2 Functional Localizer.** Three independent functional localizer runs were performed to  
235 identify category-selective regions. These runs consisted of a blocked design, in which each block  
236 included one of the following stimuli: 1) objects 2) scrambled objects 3) scenes 4) bodies 5) hands.  
237 Each run lasted 6 minutes and 36 seconds, with 50 6-second stimulus blocks (10 per condition)  
238 and ten 8-second rest blocks interspersed. In each stimulus-block, six different stimuli from the  
239 same condition were presented, where each image was shown for 800ms followed by 200ms of  
240 fixation. Additionally, there was an orthogonal motion manipulation: for each of the 5 stimulus  
241 categories, in half of the blocks the object was presented at the center of the screen, and in the  
242 other half the object moved from the center out in one of 8 randomly directions randomly.

243 Observers were instructed to maintain fixation throughout the experiment and press the button  
244 when an exact image repeated back-to-back.

245 Two of the 21 subjects performed 8 experimental runs (instead of 6) and only 2 Localizer  
246 runs (instead of 3). Data from all experimental runs for these subjects were used for data analysis.  
247 Due to a technical error, localizer runs for one subject did not include scrambled objects.

248 For the purpose of the current project, we were only interested in identifying category-  
249 selective regions Lateral Occipital Complex (LOC; Objects > Scramble; Grill-Spector, 2003),  
250 parahippocampal place area (PPA; Scenes > Objects; Epstein and Kanwisher, 1998) and Occipital  
251 Place Area (OPA; Scenes > Objects; Dilks et al., 2013). We were not able to localize area LOC in  
252 the subject for whom the scrambled objects condition was missing. To compare the coordinates of  
253 our contrasts of interest with the location of well-known category-selective regions, we also  
254 localized extrastriate body area (EBA; Downing et al., 2001) and a nearby hand-selective area  
255 (Bracci et al., 2012).

256

### 257 **2.4.3 fMRI Data Analysis.**

258 Functional neuroimaging data were analyzed using SPM12 (Ashburner et al., 2014), MARSBAR  
259 (Brett et al., 2002) and bspmview (<https://www.bobspunt.com/software/bspmview/>) on MATLAB  
260 (Versions 2014b and 2016a,b). Barplots and scatterplots were displayed using ggplot2 (Wickham,  
261 2009) in RStudio.

262 The raw functional images were submitted to preprocessing, where the first 4 volumes were  
263 discarded from each run, slice scan-time correction was performed, followed by 3D motion  
264 correction, normalization and spatial smoothing (8 mm FWHM kernel). Data were modeled using  
265 standard general linear models (GLM). The first GLM included regressors for each of the four  
266 main conditions, with run regressors and motion correction parameters included as nuisance  
267 factors. The second GLM modeled each object category as a separate condition for a total of 72  
268 regressors, with run regressors and motion correction parameters included as nuisance factors.

269

270 **2.4.4 Regions-of-interest selection.** We created our ROIs utilizing a separate set of runs from the  
271 ones we used for data-analysis. Spherical ROIs were defined around the individual peaks of  
272 activation for the whole-brain size contrast Small > Large (collapsing over motor-relevance) from  
273 two experimental runs. Univariate responses were extracted from the remaining experimental runs

274 for size and motor-relevance conditions. These ROIs were defined with a 12mm sphere (257  
275 voxels) centered around the peak positive and negative voxels in individual subjects, and then  
276 intersected with individual whole-brain gray matter masks. The selected peaks are referred to  
277 following the conventions of Konkle and Oliva (2010) and included small-object preferring  
278 bilateral inferior temporal gyrus (Small-ITG, left hemisphere [LH] n=15, right hemisphere [RH]  
279 n=17), and large-object preferring bilateral PHC (Large-PHC, LH n=16, RH n=15). After  
280 intersecting the 12mm ROI sphere with each subjects' gray-matter mask, the ROIs slightly varied  
281 in size across subjects. After intersection, the average size was 244 voxels for Small-ITG and 257  
282 voxels for Large-PHC.

283 We further identify large-object preferring TOS (Large-TOS) dorsally based on the size contrast,  
284 and a series of category-selective regions using the Functional Localizer runs. The regions  
285 identified with the Localizer were object-selective lateral occipitotemporal cortex (LOC), scene-  
286 selective parahippocampal place area (PPA), and scene-selective occipital-place area (OPA).  
287 Analysis and results for Large-TOS and the category-selective ROIs are reported in the  
288 Supplementary Material.

289  
290 **2.4.5 Voxel mask.** We produced a mask of the most reliable object-selective voxels in occipital,  
291 temporal and parietal regions using the reliability-based voxel selection method for condition-rich  
292 designs (Tarhan and Konkle, 2020). To compute the reliability maps, average beta values for odd  
293 and even runs were separated in two groups and correlated for each voxel that was included within  
294 the gray matter. To establish a reliability threshold, we then correlated the patterns for the same  
295 object category at different thresholding levels and picked the threshold at which the average  
296 correlation across conditions plateaued, which in this case was  $r = 0.25$ . We then produced a mask  
297 from the reliability map at this value.

298  
299 **2.4.6 Whole-brain conjunction analysis.** To explore the size organization across motor-relevance,  
300 we performed a random-effects conjunction analysis at the individual level between small motor-  
301 relevant > large motor-relevant and small non-motor-relevant > large non-motor-relevant.  
302 For each individual, at each voxel, t-values for the two contrasts were compared. The  $\beta$ -weight  
303 corresponding to the contrast with t-value closest to zero was then assigned to the given voxel.  
304 This resulted in eighteen conjunction maps (one for each participant) which were then submitted

305 to a one-sample t-test, and the resulting t-values were assigned to the corresponding voxels on a  
306 new map. The voxels with highest value in these new t-maps are those that are strongly activated  
307 or deactivated by both contrasts in most subjects. The resulting maps were thresholded with  
308  $q(\text{FDR}) < 0.05$ . Similarly, to explore the motor-relevance organization across size, we performed  
309 the same analysis but considering small motor-relevant > small non-motor-relevant and large  
310 motor-relevant > large non-motor-relevant contrasts.

311

#### 312 **2.4.7 Typical-Atypical contrast analysis.**

313 To further explore the relationship between size and motor-relevance, we compared maps  
314 between two contrasts: a *typical contrast* [small motor-relevant > large non-motor-relevant], which  
315 follows the real-world covariation of small objects being more motor-relevant than large objects;  
316 and an *atypical contrast* [small non-motor-relevant > large motor-relevant]. Individual maps for  
317 each contrast were submitted to a second-level analysis to obtain a group map, which was FDR-  
318 thresholded at  $q < 0.05$ .

319 To assess the reliability of the two contrasts, we further produced individual maps for each  
320 contrast separately for odd and even runs and correlated them. We then submitted individual  
321 correlations for the two separate contrasts to a t-test to assess whether there was a significant  
322 difference in reliability between the maps produced by the two contrasts.

323

### 324 **2.5 Exploratory Analysis.**

325 **2.5.1 Object Property Ratings.** Ratings for the 72 objects in our dataset were collected on a series  
326 of other dimensions to identify the ones that were best associated with the response profiles of our  
327 ROIs. All studies were conducted on Amazon Mechanical Turk with 36 judgments per object  
328 category. Each of the participants ( $n=36$ ) rated one exemplar of each of the 72 object categories,  
329 with six participants rating the same exemplars within each category. Participants were not  
330 presented with two exemplars from the same category. The following object properties were rated:

- 331 1. *Manipulability.* Manipulability tracks the degree to which hand-interactions with objects  
332 are prominent. Participants were presented with an item and rated the degree to which the  
333 object made them think of moving their hands, using a scale from 1 (not at all) to 7 (very  
334 strongly). The question asked to participants was very similar to the one posed to collect

335 the motor-relevance dimension, but here we focus on actions performed with the hands  
336 rather than with other parts of the body.

337 2. *Motion-based Identity*. The degree to which an object's parts are expected to move and  
338 change position might be a relevant property for representing objects. Participants were  
339 asked to rate on a scale from 1 to 7 the degree to which motion is important in determining  
340 the identity of the object.

341 3. *Spatial Definition*. This property is defined as “the degree to which objects evoke a sense  
342 of surrounding space” (Mullally and Maguire, 2011). Participants were asked to rate on a  
343 scale from 1 to 7 the degree to which a background is evoked when looking at a specific  
344 object.

345 4. *Position Variability*. Objects can be more or less likely to change location in the  
346 environment (i.e., a car is more likely to change location than a swing). Participants were  
347 asked to rate on a scale from 1 to 7 the degree to which an object is likely to change position  
348 in everyday life.

349 5. *Interaction Envelope*. “Interaction envelope” was operationalized as a measure of the  
350 amount of space needed to interact with the object (e.g., a hamburger needs to be  
351 manipulated with two hands that cover its whole surface, thus it has a larger interaction  
352 envelope than a coffee mug which just needs one hand on its handle to be manipulated),  
353 following Bainbridge and Oliva (2015). Participants had to judge on a scale from 0 to 2  
354 how many hands are often used when interacting with an object.

355

356 **2.5.2 Pairwise correlations.** We compared the similarity across our seven dimensions (size, motor-  
357 relevance and the additional ones collected post-hoc), and the reliability of each of the rated  
358 dimensions, in the following way. First, we divided participants into two groups and computed the  
359 mean rating for each group and each object category separately for each dimension, resulting in  
360 two group vectors of 72 mean ratings for each dimension. To compute the reliability of a  
361 dimension, we correlated the two group vectors with each other. To compute the correlation  
362 between two different dimensions, we correlated each dimension's group vectors with the other  
363 dimension's group vectors, and averaged across the four combinations.

364

365 **2.5.3 Factor Analysis.** To understand how our critical dimensions of size and motor-relevance



366 related to the variety of stimulus properties from the subsequent stimulus norming studies, we  
367 conducted a maximum-likelihood factor analysis on all seven dimensions (size, motor-relevance,  
368 manipulability, motion-based identity, spatial definition, position variability and interaction  
369 envelope) with a “varimax” rotation of the coefficients. This factor analysis was implemented with  
370 the *factanal* function in R. To determine the number of meaningful factors to extract from our  
371 dimensions, we performed a “parallel” analysis (Horn, 1965). This procedure involves generating  
372 random data and submitting them to the same factor analysis, iterated 5000 times. The average of  
373 the eigenvalues resulting from the parallel random-data factor analyses is then compared to the  
374 factors from the observed data: if the average eigenvalues from the parallel factor is smaller than  
375 the one from the data factor, then the data factor is kept. This procedure was implemented with the  
376 *fa.parallel* function in R. The three resulting factors can be summarized as relating to real-world  
377 size and context ( $f_{\text{size}}$ ), manipulability ( $f_{\text{manip}}$ ) and degree of movement ( $f_{\text{stability}}$ ). For the following  
378 ROI and searchlight analyses, for ease of interpretation, we flipped the direction of  $f_{\text{stability}}$  so as to  
379 positively correlate with degree of stability.

380

381 **2.4.6 ROI analysis with Factors as predictors.** Following the factor analysis on the behavioral  
382 ratings of the objects, we performed a linear model analysis to predict the size ROIs responses  
383 from the resulting factor scores and their interactions. To estimate the response profile of each  
384 ROI,  $\beta$ -weights for each of the 72 object categories were extracted from the GLMs of the main  
385 experiment runs. Note that this analysis was performed on runs separate from the ones used to  
386 produce the ROIs. These betas were averaged across voxels, resulting in a vector of 72 values  
387 reflecting the ROIs overall response activation to each category. The ROIs activation profiles were  
388 computed for each subject using subject-specific ROIs and GLMs.

389

390 We next sought to explain these ROI activation profiles with the factors from the factor analysis  
391 above by employing a linear modeling approach. All linear models to predict an ROI activation  
392 were implemented with the function *lm* in R. We first looked for hemispheric interactions by  
393 submitting our size ROIs to a model with the three factors, hemisphere and their interaction as  
394 coefficients. No hemispheric interaction significantly explained either Small-ITG or Large-PHC’s  
395 activation; hemisphere was thus removed from the models.

396

397 Next, we examined which of three nested models best explained activation in our size ROIs by  
398 comparing their resulting adjusted R square ( $\text{adj}R^2$ ). The three models were: one with the three  
399 factors as predictors, with no interaction terms [  $f_{\text{size}} + f_{\text{manip}} + f_{\text{stability}}$  ]; a second model that also  
400 included the two-way interaction terms [  $f_{\text{size}}*f_{\text{manip}} + f_{\text{size}}*f_{\text{stability}} + f_{\text{manip}}*f_{\text{stability}}$  ]; and a third  
401 model that also included the three-way interaction term [  $f_{\text{size}}*f_{\text{manip}}*f_{\text{stability}}$  ]. The model with the  
402 highest  $\text{adj}R^2$  was considered the one most fitting the region and the significant coefficients were  
403 explored. If two models had comparable  $\text{adj}R^2$  (rounded at the second decimal), the simpler model  
404 was picked. The same analysis was also performed on Large-TOS and in category-selective  
405 regions defined from the Functional Localizer (LOC-sphere, PPA-sphere and OPA-sphere; see  
406 Supplementary Material).

407  
408 When comparing the nested models for the highest  $\text{adj}R^2$ , we found that both Small-ITG  
409 and Large-PHC were best explained by a model with all three factors and their two-way  
410 interactions (Small-ITG:  $\text{adj}R^2 = 0.33$ ;  $F_{6,65} = 6.90$ ,  $p < 0.001$ ; Large-PHC:  $\text{adj}R^2 = 0.27$ ;  $F_{6,65} =$   
411  $5.36$ ,  $p < 0.001$ ), as compared to the model with only main effects (Small-ITG:  $\text{adj}R^2 = 0.23$ ;  
412 Large-PHC:  $\text{adj}R^2 = 0.21$ ) and the model with main effects, two- and three-way interactions  
413 (Small-ITG:  $\text{adj}R^2 = 0.32$ ; Large-PHC:  $\text{adj}R^2 = 0.26$ ).

414  
415 To evaluate the quality of the fit of the different coefficients, we looked at the resulting associated  
416 t- and p-values. T-values were computed by dividing coefficients by their standard errors, while  
417 p-values tested the significance against the hypothesis of obtaining given t-values if the  
418 coefficients were not actually contributing in explaining the dependent variable.

419  
420 **2.5.4 Searchlight Regression Analysis.** Following our findings in the spherical ROIs, we next  
421 explored which factors would best fit voxels throughout object-responsive cortex.

422  
423 The searchlight analysis was performed in the following way: within the voxel mask, a 6mm sphere  
424 was drawn around a voxel, and all voxels falling within that sphere were considered part of the  
425 neighborhood for that voxel. This procedure was performed iteratively so that each voxel within  
426 the object-selective mask was at the center of the sphere. In each searchlight ROI, voxel activation  
427 for all 72 object categories was averaged across all voxels within the sphere, and the resulting



428 vector used as the dependent variable for two models.

429

430 For each search sphere, we fit two models. The first model related size and manipulability, with  
431  $f_{\text{size}}$ ,  $f_{\text{manip}}$ , and their interaction [ $f_{\text{size}} + f_{\text{manip}} + f_{\text{size}} * f_{\text{manip}}$ ], which we refer to as *manip-model*. the  
432 second model related size and stability, with  $f_{\text{size}}$ ,  $f_{\text{stability}}$  and their interaction [ $f_{\text{size}} + f_{\text{stability}} + f_{\text{size}}$   
433  $* f_{\text{stability}}$ ], which we refer to as *stability-model*. For each given searchlight, adjusted  $R^2$  values for  
434 these two models were extracted and compared, and the model with the highest positive value was  
435 selected and assigned to that searchlight's central voxel.

436

437 To visualize which models are fitting best and where, we looked separately at small-preferring and  
438 large-object preferring voxels. Small- and large-object preferring voxels were identified based on  
439 whether the coefficient for the main effect of  $f_{\text{size}}$  was positive (preference for small) or negative  
440 (preference for large). We then visualized the coefficient maps for the interaction terms  $f_{\text{size}}*f_{\text{manip}}$   
441 and  $f_{\text{size}}*f_{\text{stability}}$  separately for large- and small-preferring voxels, comparing them with a map of  
442 the F-values for the winning model associated with each voxel.

443

## 444 3. RESULTS

### 445 3.1 Whole-brain conjunction analysis

446 We first examined whether the large-scale neural organization by real-world size of inanimate  
447 objects is preserved when disrupting the natural covariance between size and motor-relevance. To  
448 do so, we conducted a conjunction analysis to isolate regions which show a large vs small object  
449 difference that holds when comparing motor-relevant as well as non-motor-relevant objects (see  
450 Methods).

451  
452 When looking at the real-world size organization, we found regions that showed a  
453 preference for small over large objects, and for large over small objects, regardless of the motor-  
454 relevance preference. The whole brain maps can be visualized in Figure 2a, with the group MNI  
455 coordinates at the bottom of the figure. With respect to small objects, we observed activation  
456 bilaterally in ITG and in the left hemisphere and along the lateral aspect of the fusiform gyrus. In  
457 the left hemisphere, the region for small objects expanded posteriorly to the lateral occipital cortex.  
458 With respect to large objects, along the ventral surface of the occipitotemporal cortex, we observed  
459 bilateral regions corresponding to the parahippocampal cortex. A preference for large objects was  
460 also present more dorsally in the lateral surface in the occipital place area (OPA) in individual  
461 participants, but this region did not survive the group-level conjunction test at the FDR threshold  
462 depicted in Figure 2a. Overall, this group-level conjunction analysis reveals that, even when taking  
463 into account motor-relevance, the real-world size of objects drives large-scale differential  
464 responses across the ventral stream.

465  
466 Next, we examined whether also motor-relevance, when disrupting its natural covariance  
467 with size, would elicit a large-scale organization across this cortex. Another whole-brain  
468 conjunction analysis was conducted, comparing motor-relevant objects vs non-motor-relevant  
469 objects, requiring this relationship to hold for both large object and small objects independently.  
470 The results are mapped in Figure 2b, with the group MNI coordinates at the bottom of the figure.  
471 Along the lateral surface, we observed regions with a stronger response to motor-relevant objects,  
472 with peaks in LO bilaterally. Along the medial aspect of the ventral surface, we found stronger  
473 responses to non-motor-relevant objects primarily in the right hemisphere, with the peak activation  
474 located slightly anterior to the large-object preferring region. This analysis reveals that the

475 dimension of motor-relevance also elicits stable response differences in parts of object-responsive  
476 cortex.

477

478         Notably, these conjunction maps yielded relatively similar organizations. Specifically,  
479 lateral regions prefer both small and motor-relevant objects; while ventromedial regions prefer  
480 both large and non-motor-relevant objects. These findings indicate that neither size alone nor  
481 motor-relevance alone are sufficient to explain the large-scale organization of responses to objects  
482 along occipitotemporal cortex. Further, these results highlight that there is a clear association  
483 between the two dimensions and how they map across the cortex.

484



## 492 3.2 Typical-atypical Contrasts

493 To further explore the relationship between size and motor-relevance, we compared maps  
494 between two contrasts: a *typical contrast* (small motor-relevant > large non-motor-relevant), which  
495 follows the real-world covariation of small objects being more motor-relevant than large objects;  
496 and an *atypical contrast* (small non-motor-relevant > large motor-relevant; Figure 3a). These maps  
497 are shown in Figure 3.

498  
499 When looking at surface maps produced by the typical contrast, we find extensive activations  
500 along the lateral and ventral surfaces (Figure 3b). In contrast, the surface maps produced by the  
501 atypical contrast (Figure 3c) are less extensive and also less reliable in a split-half analysis  
502 (typical split-half map correlations:  $M=0.61$ ,  $SD=0.18$ ; atypical:  $M=0.43$ ,  $SD=0.24$ ;  $t_{17}=2.70$ ,  
503  $p<0.05$ ).

504  
505 These topographic observations mirror the ecological covariation of these factors (Figure 3a):  
506 while it is theoretically possible to artificially dissociate size and motor-relevance as we have done  
507 in this stimulus set, in every day experience small objects tend to be more motor-relevant and large  
508 objects less so. And we found this covariation to also be evident in the neural data (see Figure  
509 3b,c). Taken together, these data show the importance of the interaction between size and motor-  
510 relevance in driving more reliable and robust neural responses, thus revealing the importance of  
511 the natural covariation between these two properties in the visual system.

512  
513  
514  
515  
516  
517

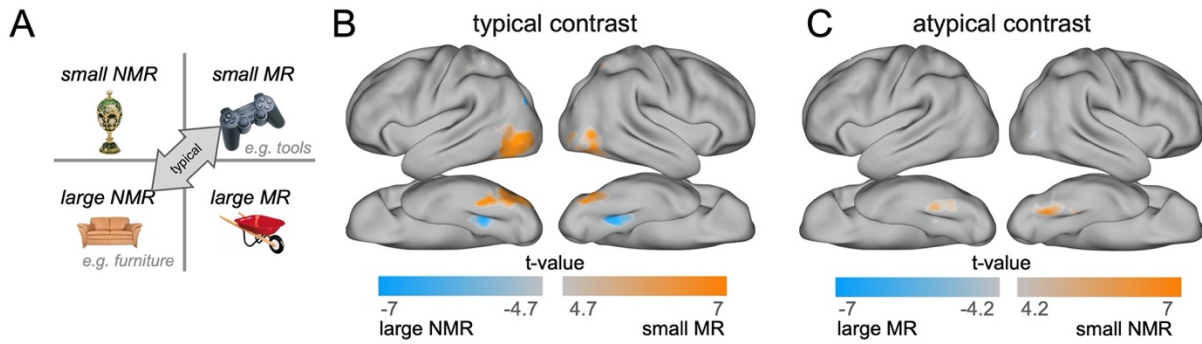

518

519 [2 columns fitting]

520 **Figure 3. Typical/Atypical contrast Analysis.** a) simplified representation of the size x motor-  
521 relevance design. Arrow points to the typical contrast conditions, representing the covariation  
522 commonly observed in the environment. b) Typical contrast: small motor-relevant > large non-  
523 motor-relevant. c) Atypical contrast: small non-motor-relevant > large motor-relevant. Contrasts  
524 were thresholded at  $q(\text{FDR}) < 0.05$ .

525

### 526 3.3 Exploratory Analyses

527 **3.3.1 Factor Analysis.** We next explored the possibility that the relationship between size and  
528 motor-relevance may be more multifaceted than what can be gathered from a simple 2 x 2 design.  
529 Our goal for this analysis was to understand and explore how other, related properties that have  
530 been proposed in the past relate to our findings and predict neural responses at the category level.  
531 To do so, we collected ratings along five additional dimensions of our 72 object categories and  
532 submitted them to a factor analysis together with size and motor-relevance.

533 First, manipulability ratings were obtained, which focused on hand movements specifically,  
534 in order to understand the extent to which our motor-relevance dimension correlated with this  
535 previously studied dimension (Mahon et al., 2007). We also examined a number of dimensions  
536 that have been previously proposed as significant modulators of tool regions or scene regions,  
537 namely interaction envelope (Bainbridge and Oliva, 2015), spatial definition (Mullally and  
538 Maguire, 2011), and motion-based identity (Beauchamp, 2005). Finally, based on our observation  
539 regarding low responses to vehicles in Large-PHC, we obtained “position variability” ratings,  
540 capturing how often an object changes its position in the environment. Note that these properties  
541 were defined after having seen the data, and thus any role they play in explaining neural data  
542 requires independent follow-up studies to confirm.

543           The relationship among these ratings and our original size and motor-relevant dimensions  
544 are detailed in Figure 4. All ratings had a relatively high reliability (Figure 4a, shaded diagonal  
545 numbers), with a range of similarity relationship between any pair of dimensions (Figure 6b).  
546 There are a couple observations to note from inspecting these pairwise correlations and scatter  
547 plots. First, by design, size and motor-relevance were completely uncorrelated in this stimulus set.  
548 Second, the correlation between motor-relevance and manipulability was at ceiling, virtually  
549 identifying the same property. As mentioned in the introduction, most motor-relevant objects  
550 involved hands for their interaction; including whole-body actions in the motor-relevance score  
551 had a minimal or non-existent effect (the only exception being the skateboard which was high in  
552 motor-relevance but low on manipulability).

553           Next, we extracted the latent dimensions within this dataset using factor analysis (see  
554 Methods). A parallel analysis procedure determined that three factors should be retained, which  
555 were sufficient to explain more than 80% of all variance among the ratings. The property loadings  
556 for each factor are shown to the right in Figure 4a.

557           The first factor was loaded mostly by manipulability, motor-relevance and interaction  
558 envelope—it seemed thus to be most related to *actions and hand-object interactions*. The second  
559 factor was loaded by size and spatial definition, and was thus most related to the *physical presence*  
560 of the object. Finally, motion-based identity, position variability and motor-relevance loaded  
561 strongly on the third factor, which seemed thus to capture the *mobility/movability of the object*.

562           Considering these factors within the context of our main design, our motor-relevance  
563 dimension was effectively split into two factors, one related to hand-object interactions ( $f_{\text{manip}}$ ) and  
564 one related to an object's mobility/movability ( $f_{\text{stability}}$ ), and both of these were separate from the  
565 more physical properties of size and, to a lesser degree, spatial definition ( $f_{\text{size}}$ ). Thus, while our  
566 stimulus set was collected as varying along only two primary factors (size and motor-relevance),  
567 the factor analysis indicated that this stimulus set is better characterized along three factors (size,  
568 manipulability and stability).

569           We next explored how well the three factors extracted from our ratings can explain the  
570 neural response profiles, both in a targeted ROI analysis and in a broader searchlight analysis. Note  
571 that these analyses were unplanned and should be considered post-hoc and exploratory in nature.



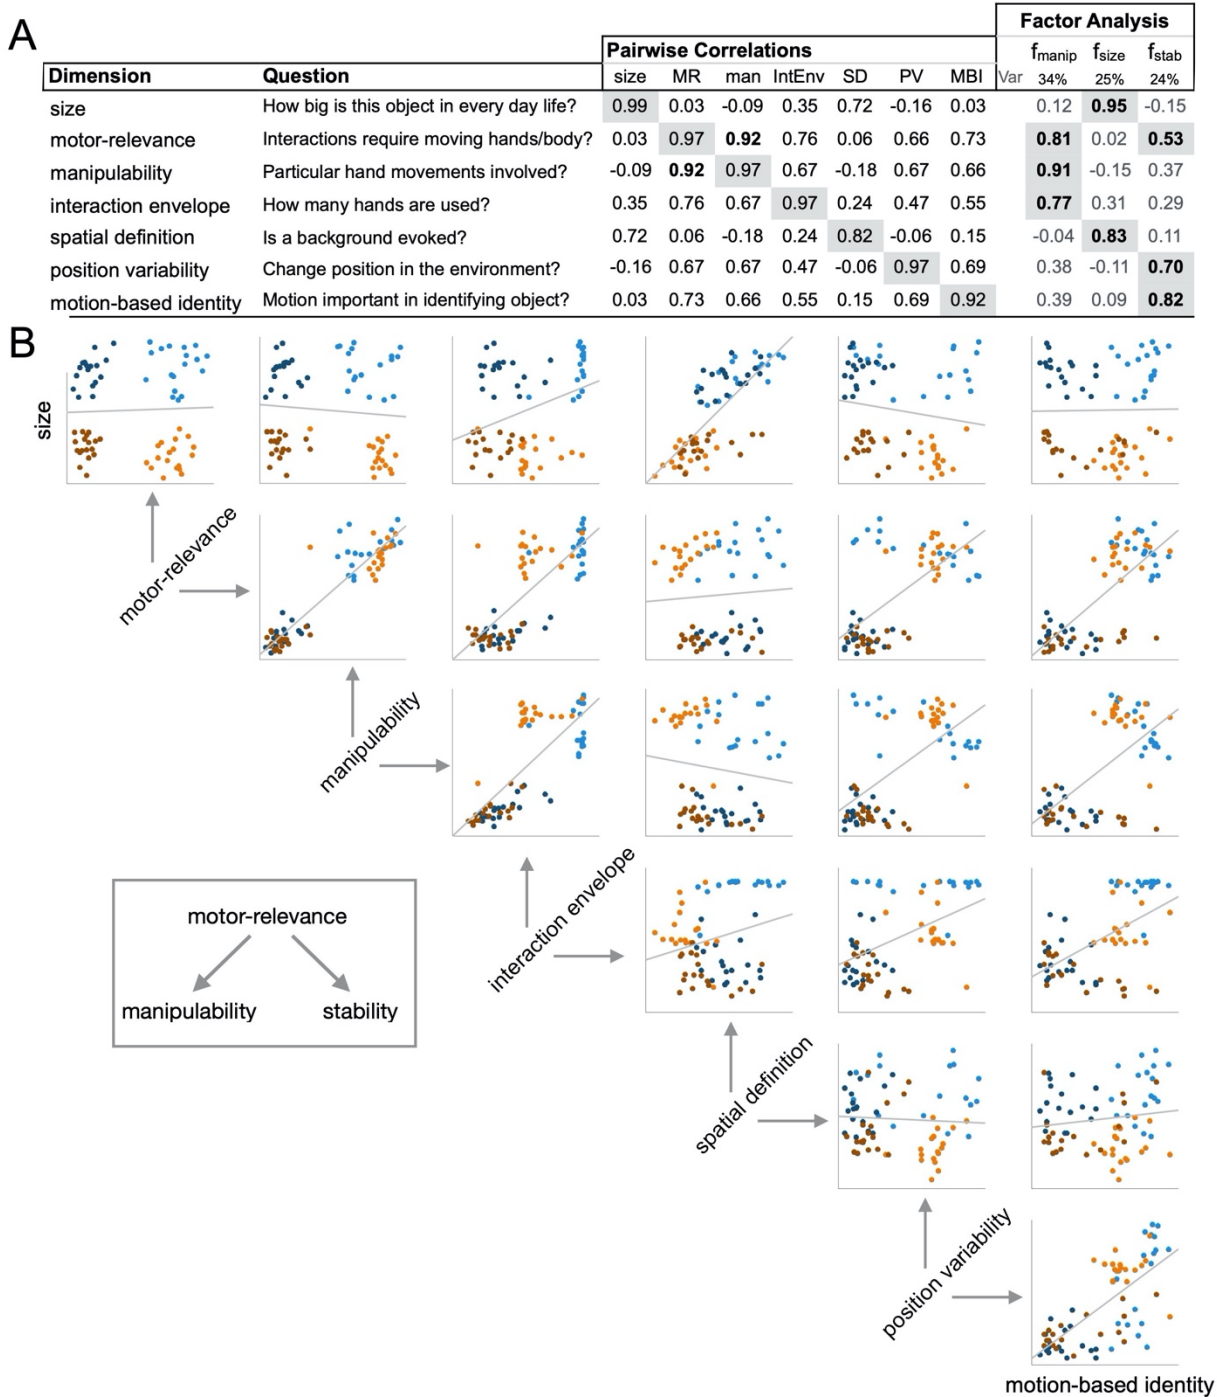

572

573 [2 column fitting]

574 **Figure 4. Object dimension similarity and Factor Analysis.** a) For each rated object property,  
 575 the subplot shows the dimension label, the question asked to elicit ratings on the dimension, the  
 576 correlation to the other dimensions, where the rating's reliability is shaded, and the dimension's  
 577 loading in a factor analysis. b) Scatter plots are shown for all pairs of 7 dimensions, where each



578 *dot reflects an object category and is color-coded based on its size and motor-relevance rating*  
579 *(light orange – small motor-relevant; dark orange: small non-motor relevant; light blue: large*  
580 *motor-relevant; dark blue: large non-motor-relevant).*

581

582

583

584 **3.3.2 ROI Analysis.** To explore how well the three factors could explain fMRI responses, we  
585 employed a linear modeling analysis explaining the activation profile in each ROI, with the three  
586 factors obtained from the factor analysis and their interactions as regressors (see Methods). The  
587 goal was to see which weighted combination of factors best predicted a region’s response variation  
588 to the 72 objects. This finer-grained analysis looking at responses to all 72 object categories was  
589 possible due to our nested fMRI protocol design (see Methods), in which the neural responses  
590 could be modeled at the category-level for each of the 72 categories independently (see Figure 1).  
591 Note that these three factors were determined only from the behavioral ratings of our stimulus set.  
592 Further, for interpretive clarity, we reversed the sign of  $f_{\text{stability}}$  so that high values indicate high  
593 “fixedness” (rather than high mobility.) This transformation does not affect the significance of the  
594 statistical results.

595 After determining which model was a best fit for each region, we looked at the factors  
596 within the winning models that significantly contributed to the fit (see *Methods*), and whether they  
597 were positive or negative, to understand the models’ relationship to the data (Figure 5a).

598 In Small-ITG, the results indicate that the best prediction of neural response magnitude  
599 was given by a combination of *size* and of the *manipulability* component of motor-relevance: there  
600 was a significant effect of  $f_{\text{size}}$ , as well as the interaction of  $f_{\text{size}}$  and  $f_{\text{manip}}$  (see Figure 5a, top for  
601 statistical results). The interaction between these factors further indicates that it is specifically  
602 small objects involved in hand-object actions which drive the strongest responses in this region.  
603 Thus, the distinction of hand-object action and manipulability is a better descriptor of the responses  
604 in this region over the more general concept of motor-relevance.

605 In Large-PHC we observed a different pattern: the coefficients that significantly explained  
606 the model were  $f_{\text{size}}$  and the interaction of  $f_{\text{size}}$  and  $f_{\text{stability}}$  (see Figure 5b, bottom row for statistical  
607 results). Thus, responses in this region were driven most by large objects that are stable in the  
608 environment. This result in Large-PHC clarifies what we observed in earlier analyses employing

609 the 2 x 2 design: rather than the low-action component of motor-relevance, it might be the *fixedness*  
610 component of this construct the one most driving neural representations in this area. That is, the  
611 *stability* component of non-motor-relevance is the one to best predict response magnitude in Large-  
612 PHC.

613 To better understand these relationships, we visualize them in Figure 5c: for each ROI, the  
614 activation to each category is plotted on the y-axis as a function of the manipulability factor for  
615 Small-ITG, and the stability factor for Large-PHC. Each dot is color-coded based on the  $f_{\text{size}}$  value  
616 for the corresponding object. This plot reveals that the manipulability factor drives activation in  
617 Small-ITG but mostly for small objects (increasing activity for more manipulable small objects,  
618 see Figure 5c, top). In contrast, inspection of the scatterplot for Large-PHC suggests that activation  
619 is driven by stability but mostly for large objects (increasing activity for more stable large objects,  
620 see Figure 5c, bottom). These relationships are also evident in the activation profiles of the two  
621 ROIs in Figure 6: For Small-ITG, tools are the small objects that drive the most activation (e.g.  
622 nail clipper, hand rack, yo-yo; see Figure 6a), while for Large-PHC, means of transport tend to be  
623 the large objects that drive the least activation (e.g. bike, scooter, jet-ski; see Figure 6b).

624

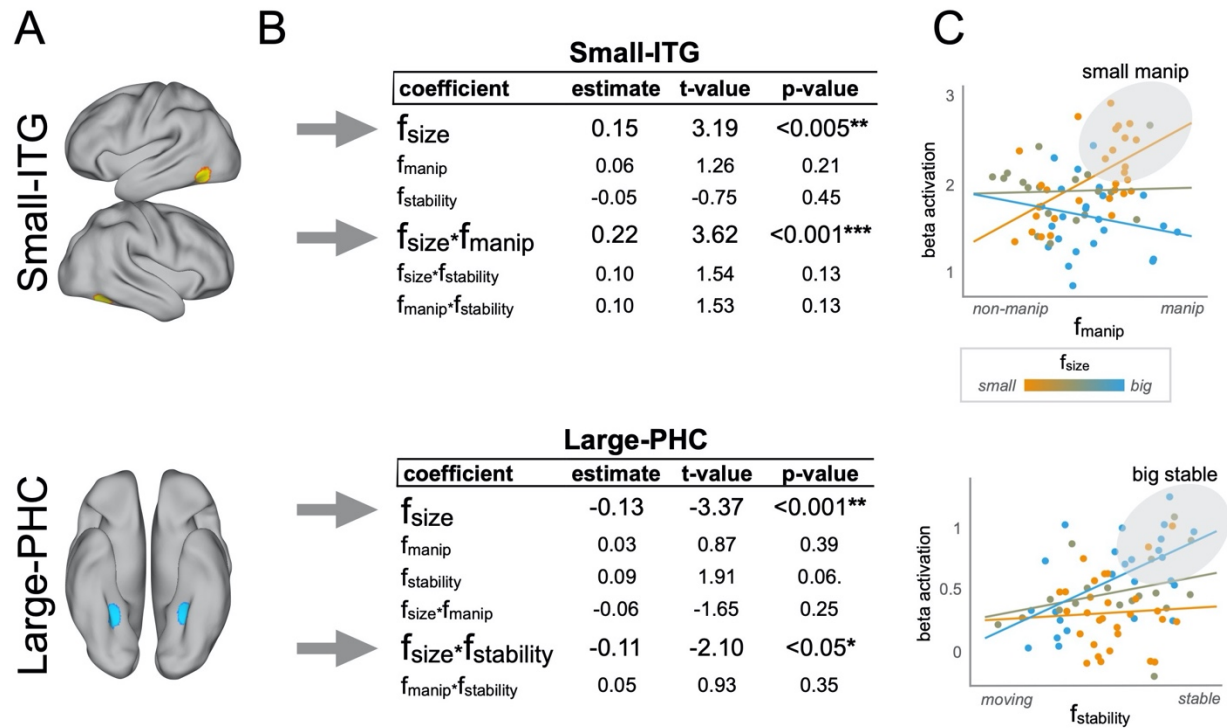

625

626 [2 column fitting]

627 **Figure 5 ROI analysis.** a) Visualization of size ROIs Small-ITG and Large-PHC in one example  
 628 subject. b) GLMs with ROIs' activity as dependent variable and factor scores as independent  
 629 variables. Shown are estimates for all predictors included in the model, t-value and p-value. The  
 630 t-value was measured by dividing the coefficients by their standard errors. The p-value tested the  
 631 hypothesis of obtaining the observed t-value if the coefficient were actually zero. c) Top: scatterplot  
 632 of Small-ITG's activation by  $f_{manip}$  (x-axis) and  $f_{size}$  (y-axis). Dots are color-coded based on the  $f_{size}$   
 633 weight from blue (low-weight, large size) to orange (high weight, small size). Bottom: scatterplot  
 634 of Large-PHC's activation by  $f_{stability}$  (x-axis) and  $f_{size}$  (y-axis). Same color-coding scheme as  
 635 described for the plot above.

636

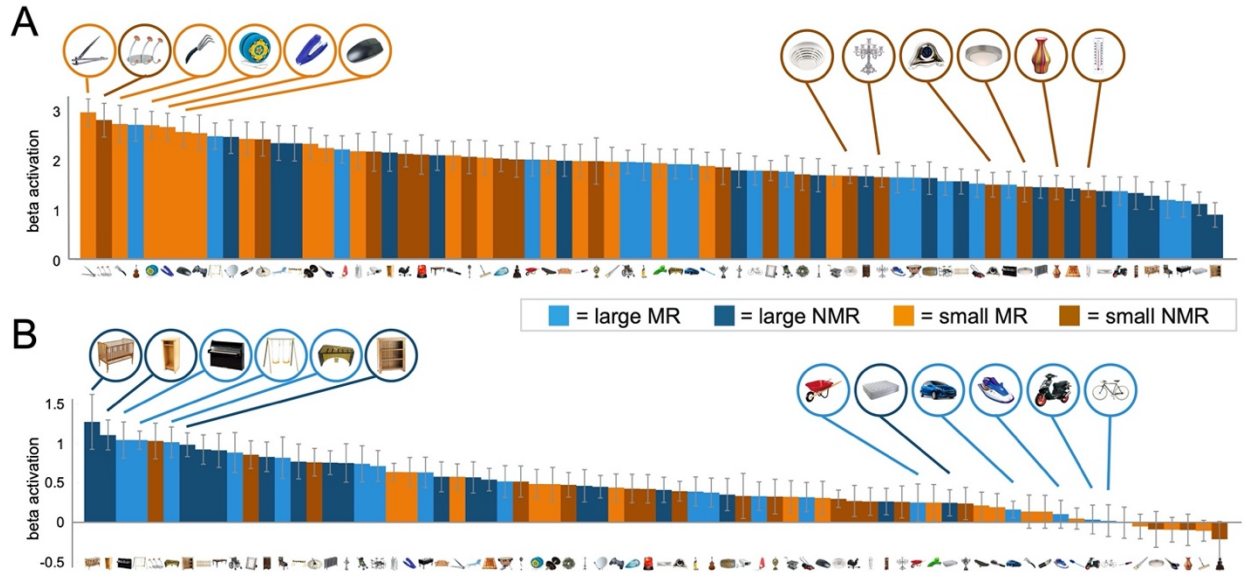

637

638 [2 column fitting]

639 **Figure 6 Barplots of ROIs activation.** Mean activation to each of the 72 object categories are  
640 plotted for each region (a: Small-ITG; b: Large-PHC), where the categories are rank-ordered  
641 from most to least active. Object categories are color-coded based on their size and motor-  
642 relevance conditions (light orange: small motor-relevant; dark orange: small non-motor-relevant;  
643 light blue: large motor-relevant; dark blue: large non-motor-relevant). Error bars reflect  $\pm 1$  SEM  
644 across subjects.

645

646

647

648 Taken together, these analyses begin to characterize the nature of the ecological covariation  
649 between size and motor-relevance, clarifying how these object properties fit together. For example,  
650 no one factor alone (size, manipulability, stability) best accounted for the responses in any ROI.  
651 Rather, manipulability (or hand-relevance) of an object matters more for small objects in the lateral  
652 cortex, and stability of an object matters more for large objects in ventral cortex. Finally, these  
653 findings are consistent with prior literature that has focused on either the ventral or lateral surface  
654 separately (e.g., Bracci et al., 2012; Mullaly and Maguire, 2011), unifying these separate  
655 observations in one common data set and analysis procedure.

656

657 **3.3.3 Additional ROIs.** To more directly relate our findings to previous literature, we also  
658 conducted these same analyses in the classic scene regions, parahippocampal place area and  
659 occipital place area (PPA and OPA; Epstein et al., 2014), and object-responsive lateral  
660 occipitotemporal cortex (LOC; see Methods and Supplementary Material). These regions are  
661 adjacent and partially overlapping with the size ROIs (see also Konkle and Oliva, 2012). The  
662 findings in these classic regions generally converge with what was observed for the size ROIs: in  
663 LOC, there was a significant contribution of  $f_{\text{size}}$ , and a significant contribution of the interaction  
664 between  $f_{\text{size}}$  and  $f_{\text{manip}}$ . In PPA, there was a significant contribution of the size factor, and  
665 marginally of stability and of the interaction between size and stability (see Supplementary  
666 Material).

667 Further, we conducted these analyses in an additional occipitodorsal region identified with  
668 the [Large > Small] size contrast from two runs of the main experiment (Large-TOS) and in  
669 adjacent scene-selective occipital place area (OPA; see Supplementary Material). In Large-TOS,  
670 we found a result parallel to our observation in PPA: a significant contribution of  $f_{\text{size}}$  and of the  
671 interaction between  $f_{\text{size}}$  and  $f_{\text{stability}}$ . However, this result did not replicate in OPA where only  $f_{\text{size}}$   
672 had a significant contribution.

673

674

675 **3.3.4 Searchlight Analysis.** By focusing on the ROIs produced by the size contrast, we were able  
676 to explore whether other factors beyond size and motor-relevance were important in these  
677 ROIs—to which the answer is clearly yes: motor-relevance was indeed split into two sub-  
678 dimensions, one more related to manipulability, and one more related to stability, which  
679 dissociated in explaining small- and large-object ROIs. However, by performing a targeted ROI  
680 analysis, we might have missed additional regions with different associations between these  
681 factors.

682

683 Given the complexity of the number of possible interactions among these factors, we  
684 approached the searchlight analysis with a more targeted comparison. Specifically, we mapped  
685 which regions showed a better model fit among two candidate models: one that associates size  
686 and manipulability (manip-model) and one that associates size and stability (stability-model; see

687 Methods). All searchlight analyses were conducted within a reliable voxel mask (see Methods).  
688 The results of this analysis are shown in Figure 7.

689  
690 From this analysis, we can gather two main conclusions. First, we found that the voxels with  
691 best fitting models (i.e., the ones with highest F-value, see Figure 7, center) focused mostly in  
692 the lateral occipitotemporal region and in the ventromedial occipitotemporal regions, in areas  
693 mostly overlapping with size ROIs Small-ITG and Large-PHC (outlined in black in Figure 7a,b).  
694 Thus, our targeted ROIs seemed to cover most OTC areas where voxels' information could be  
695 explained by a combination of the three factors.

696  
697 Second, we found that the best-fitting voxels resulting from the searchlight analysis largely  
698 confirmed our targeted ROI analyses. Indeed, small-object preferring voxels in the lateral  
699 occipitotemporal region (i.e., the ones with positive  $f_{\text{size}}$  coefficients for the winning model)  
700 presented a positive interaction of the size and manipulability factors (Figure 7a top, colored in  
701 yellow), similarly to what was observed in the ROI analysis for Small-ITG: that is, the smaller  $f_{\text{size}}$   
702 (the smaller the object), and the higher  $f_{\text{manip}}$  (the more manipulable the object), the stronger the  
703 activation. Similarly, we found that large-object preferring voxels in ventromedial  
704 occipitotemporal region (i.e., the ones with negative  $f_{\text{size}}$  coefficients for the winning model)  
705 presented a negative interaction of the size and stability factors (Figure 7b, top, colored in green),  
706 similarly to what observed in our ROI analysis for Large-PHC: that is, the lower  $f_{\text{size}}$  (the bigger  
707 the object), and the higher  $f_{\text{stability}}$  (the more stable the object), the stronger the activation. For ease  
708 of comparison, we have drawn a black outline on the searchlight coefficient maps of the size ROIs  
709 Small-ITG (Figure 7a) and Large-PHC (Figure 7b) for one example subject, from which it is clear  
710 that the targeted ROI analyses do in fact highlight the major structure in neural responses by our  
711 three factors.

712



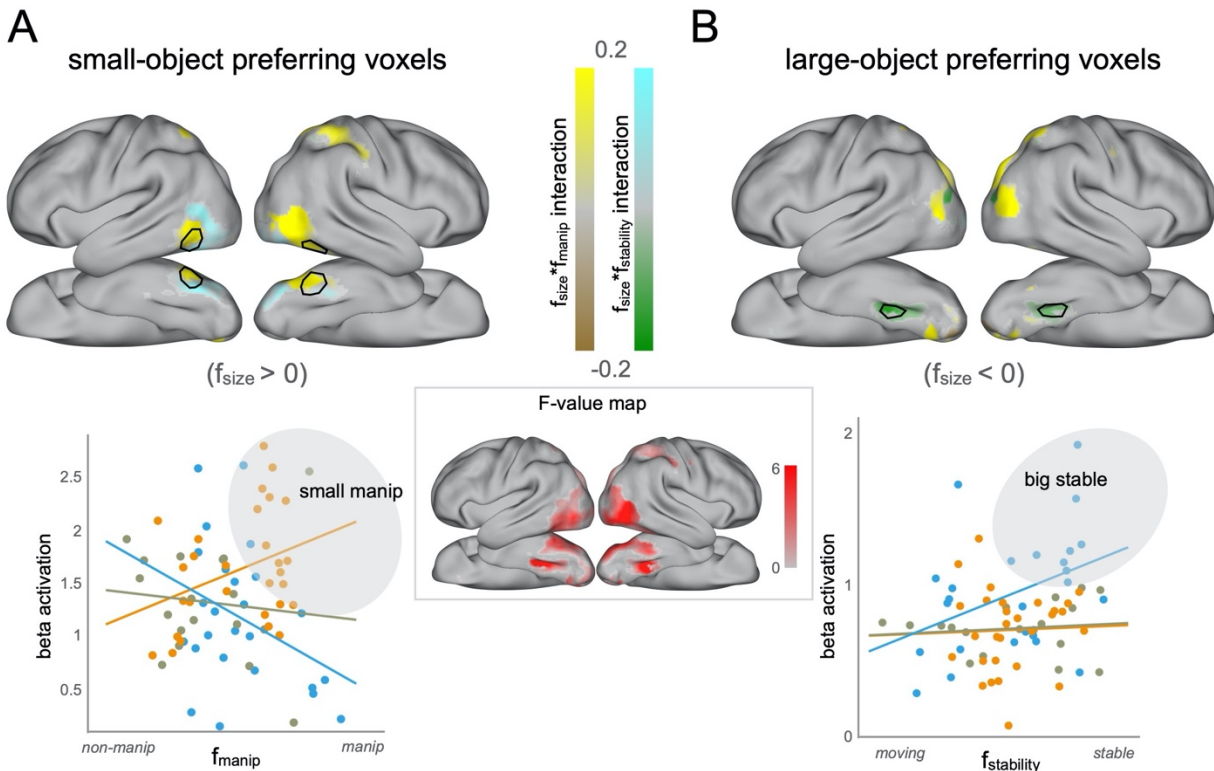

713

714 [2 column fitting]

715 **Figure 7. Searchlight Analysis.** a) Top: surface map of interaction coefficients for small-object  
 716 preferring voxels (i.e., voxels with a positive  $f_{size}$  coefficient). In voxels in which the winning model  
 717 was the manip-model, that voxel is colored according to its  $f_{size} * f_{manip}$  interaction coefficient  
 718 estimate in a brown to yellow scale. In voxels in which the winning model was the stability-model,  
 719 that voxel is colored according to its  $f_{size} * f_{stability}$  interaction coefficient estimate in a green-to-cyan  
 720 scale. Bottom: scatterplot of activation by  $f_{manip}$  (x-axis) and  $f_{size}$  (y-axis) for all voxels showing a  
 721 positive  $f_{size} * f_{manip}$  interaction in lateral OTC. Dots are color-coded based on the  $f_{size}$  weight from  
 722 blue (low-weight, large size) to orange (high weight, small size). b) Top: surface map of interaction  
 723 coefficients for large-object preferring voxels (i.e., voxels with a negative  $f_{size}$  coefficient). In voxels  
 724 in which the winning model was the manip-model, that voxel is colored according to its  $f_{size} * f_{manip}$   
 725 interaction coefficient term in a brown-to-yellow scale. In voxels in which the winning model was  
 726 the stability-model, that voxel is colored according to its  $f_{size} * f_{stability}$  interaction coefficient estimate  
 727 in a green-to-cyan scale. Bottom: scatterplot of activation by  $f_{stability}$  (x-axis) and  $f_{size}$  (y-axis) for  
 728 all voxels showing a negative  $f_{size} * f_{manip}$  interaction in ventromedial OTC. Dots are color-coded  
 729 based on the  $f_{size}$  weight from blue (low-weight, large size) to orange (high weight, small size).

730 At lower F-value levels, we observed two more nuanced relationships. However, given the  
731 lower fit of either manip-model or stability-model within these voxels, one can only draw tentative  
732 inferences from these results.

733  
734 First, a significant portion of small-object preferring voxels in the lateral occipitotemporal  
735 surface (Figure 7a, top, colored in cyan) are fit best by models with size and stability, and show a  
736 negative interaction between the size and stability factors. Inspection of activation to all 72 object  
737 categories in this area shows a preference for moving over non-moving things (see Supplementary  
738 material) which is in line with the presence of movement-preferring region MT+ in the lateral  
739 surface.

740  
741 Second, we also observed large-object preferring voxels in the dorsal occipitoparietal region,  
742 where most voxels (Figure 7b, top, colored in yellow) indicate a positive interaction of the size  
743 and manipulability factors while a few voxels (colored in green) indicate a negative interaction of  
744 the size and stability factors. However, inspection of the scatter plots for these regions showed that  
745 these interactions were not as simple and easily interpretable as the ones observed in areas  
746 neighboring our size ROIs (see Supplementary Material). From these results, it is clear that there  
747 are systematically varying object responses in this dorsal occipital part of the cortex, but none of  
748 the three factors or their interactions cleanly provides a description of what explains the object  
749 activations.

750



## 751 4. DISCUSSION

752 Here, we examined whether the large-scale organization of neural responses to object size  
753 could be better explained by the factor of motor-relevance. This was not the case – we found that  
754 the contrasts of small vs large objects elicited a clear size organization for both motor-relevant and  
755 non-motor relevant objects. We also found that motor-relevance, independent of size, accounted  
756 for some of the large-scale structure of neural responses. This observation confirms the importance  
757 of motor interaction as an explanatory dimension in the ventral visual stream. Crucially, however,  
758 further analyses showed the two dimensions to not be independent, in that more typical  
759 combinations (small and motor-relevant, large and non-motor-relevant) elicited more reliable  
760 representations than less typical ones.

761  
762 Our subsequent exploratory analyses helped to refine and clarify these results. Specifically,  
763 a factor analysis revealed that the construct of motor-relevance could be divided into two  
764 underlying dimensions, one better related to *manipulability* (i.e., related to hand performed  
765 actions), and one better related to an object's *physical presence* and stability. Further ROI and  
766 searchlight exploratory analyses revealed that the manipulability factor was a better descriptor of  
767 activation in small-object preferring lateral OTC, while the stability factor was a better descriptor  
768 of activation in large-object preferring ventromedial OTC.

769 Broadly, these results begin to characterize how the ecological covariation between size  
770 and behaviorally relevant object properties contributes to the observed dissociations between  
771 object categories in the ventral stream regions with a preference for the inanimate domain. In the  
772 next two sections, we situate these findings in the literature, and discuss how they inform the  
773 deeper theoretical question of what drives the neural organization of inanimate objects.

774

### 775 4.1 Dissociations within the inanimate-domain

776 Objects are characterized by numerous visual properties, real-world size being one of them.  
777 However, size tends to correlate with other visual and non-visual properties. There are suites of  
778 partially related factors that predict neural responses to inanimate objects, with a major division  
779 between small, manipulable objects on one side and large, stable, navigationally relevant objects  
780 on the other (e.g., He et al., 2013; Peelen et al., 2013; Julian et al., 2016; Mullally and Maguire  
781 2011; Troiani et al., 2014; Auger et al., 2013; Bracci et al., 2012; MacDonald and Culham, 2015;

782 Bainbridge and Oliva, 2015). Overall, these findings point to a richer organization than simply  
783 object size as such, where different brain regions may be sensitive to size in the presence of other  
784 object properties for different reasons (Bi et al., 2015).

785  
786 For example, along lateral OTC and middle temporal gyrus, there is a mosaic of partially  
787 overlapping regions whose response magnitudes are predicted by a range of related factors, from  
788 more primitive object shape (Grill-Spector, 2003), to real-world size (Konkle and Oliva, 2012;  
789 Julian et al., 2016), to tools and other objects that are manipulated by the hands (Lewis 2006;  
790 Bracci et al., 2012; MacDonald et al., 2015; Mruczek et al., 2013; Lingnau and Downing, 2015).  
791 These regions are also adjacent to motion-selective cortex and body-preferring regions (Grill-  
792 Spector and Weiner, 2014), including a region that jointly responds to both tools and hands,  
793 spanning the animate/inanimate divide (Bracci and Peelen, 2013; Striem-Amit et al., 2017). While  
794 the number of regions and exact functional divisions along this cortex are still being clarified, from  
795 our results and these others, it is clear that these regions are most strongly related to small,  
796 movable, manipulable items.

797  
798 Along ventromedial OTC, where scene-preferring PPA is located, there are now a number of  
799 converging results characterizing the object properties that are best associated with responses to  
800 isolated objects. These factors include the degree to which the object invokes a local tridimensional  
801 space, its size, its tendency to stay fixed in the world, and can be generally summarized by an  
802 overarching construct of spatial stability and landmark suitability (Troiani et al., 2014, Mullally  
803 and Maguire, 2011; Julian et al., 2016; Auger et al., 2013; see also Epstein et al., 2014). While  
804 these studies examining PPA responses differ in their stimulus sets, designs, and even mode of  
805 presentation (e.g., pictures, mental imagery), they all leverage condition-rich designs and factor  
806 analyses to characterize the configuration of related object properties. While our observation of a  
807 role of spatial stability in PHC cannot in isolation lead to strong inferences, given that it is the  
808 product of a post-hoc analysis, it joins this collection of studies, adding to the diversity of stimulus  
809 sets and neuroimaging designs that show converging evidence that size in the context of position  
810 fixedness best explains the object responses in this region.

811

812 Our results, jointly with these collections of studies, suggest that a division based on  
813 manipulability for small objects and stability for large objects is fundamental in the organization  
814 of inanimate object responses.

815

#### 816 **4.2 What drives this object organization?**

817

818 Turning to the broader question of *what drives* the spatial organization of object domains in  
819 visual cortex, as opposed to what visual properties are explicitly encoded in domain-specific  
820 regions, one answer is that the observed specialization is the result of evolutionary pressures to  
821 maximize the efficient mapping of visual representations onto the appropriate downstream regions  
822 engaged in action relevant processing for a given object domain (Caramazza and Shelton, 1998;  
823 Mahon et al., 2009; Mahon and Caramazza, 2011; Konkle and Caramazza, 2017; Conway, 2018).  
824 Candidate domains are manipulable (tools) and navigation-relevant objects. On this account, the  
825 representations computed in these regions are shape configurations and texture values that  
826 statistically reflect the distinguishing properties of manipulable versus navigation-relevant object  
827 domains. And, in the measure to which real-world size is differentially correlated with the two  
828 object domains (for example, large objects tend to be bulkier) it will have contributed to the  
829 evolving preferences for different visual features and configurations in the lateral and ventral  
830 occipitotemporal cortex. In other words, the two inanimate-object-preferring regions respond  
831 preferentially to, and presumably encode, the types of shape and texture properties that are  
832 associated with prototypical manipulable (small, graspable) objects and navigation-relevant (large,  
833 stable/stationary) objects.

834

835 It is relevant to note here that this view is fully compatible with accounts that emphasize the  
836 statistics of visual experience, wherein experienced eccentricity has played an evolutionary role in  
837 helping determine the localization of object domain preferences in the brain since it reflects the  
838 natural distribution of object viewing: more foveal, required for accurate reaching/grasping for  
839 small manipulable objects, versus more peripheral, associated with the requirement for capturing  
840 spatial (context) relations for large space-defining objects (Malach et al., 2002, Arcaro et al. 2009;  
841 Mahon and Caramazza, 2011; Konkle and Oliva, 2012; Gomez et al., 2017).

842

843           A crucial distinction is being drawn here between, on the one hand, the factors that may  
844 have determined the observed neural specialization in different regions of OTC for different types  
845 of inanimate objects and, on the other hand, the information being computed/represented in those  
846 specialized areas. The role of the object property “size” at these two levels of description of neural  
847 specialization is illustrative in this regard. It could be argued that real-world object size, because  
848 of its role in distinguishing between manipulable and navigation-relevant object types, contributed  
849 to help select the visual shape/texture properties that characterize the observed domain  
850 specialization in OTC. But what about the role of the visual property “size” in characterizing the  
851 computations/representations in these neural regions? Is this visual property explicitly  
852 computed/represented in these areas? One reading of the available results is that size is not directly  
853 computed/represented in these areas.

854

855           There are at least three senses of the property size in the context of visual processing:  
856 subtended visual angle, perceived physical size, and real-world size. Konkle and Oliva (2012)  
857 found that only objects’ real-world size, and not retinal or inferred size, is related to regional  
858 specialization. However, this generalization is tempered by the observation, reported in Konkle  
859 and Caramazza (2013), that the effect of real-world size is limited to inanimate objects: real-world  
860 size differences in the animate domain are not associated with regional specialization. An  
861 implication of this observation, consistent with the results reported here, is that it is not real-world  
862 size, as such, that drives neural responses but the types of visual shapes that are typically associated  
863 with inanimate small, manipulable objects versus large, stable objects (e.g., Long et al., 2016).  
864 Furthermore, the property real-world size of an object is a “constructed” value that is retrieved  
865 from memory and has no obvious description in a vocabulary of visual properties such a shape,  
866 orientation, texture, and color. Indeed, the notion “real-world size” is a kind of  
867 conceptual/functional information like the properties “manipulability” and “navigation-  
868 relevance”, and none of these types of information is directly represented in the putative, size-  
869 responsive areas.

870

871           By positing a key role for domain-related processing, this view provides an account of data  
872 from congenitally blind individuals, who show response preferences in similarly located regions  
873 of occipitotemporal cortex when hearing the names of animate versus inanimate objects or big

874 versus small artifacts (e.g., Mahon et al., 2009; Wolbers et al., 2011; He et al., 2013; Peelen et al.,  
875 2013; Bi et al., 2015; Mattioni et al., 2020). Since ontogenetic visual experience could not have  
876 contributed to the similar patterns of object-preferring effects in high-level visual areas in  
877 congenitally blind and sighted individuals, it invites the conclusion that the observed specialization  
878 predates such experience. While the domain account provides a principled framework for  
879 explaining the potential functional basis for the observed large-scale organization of “visual”  
880 cortex, it is silent on the specific representational content at any given level of visual processing.  
881 Investigation of the specific perceptual features – e.g., elongated versus bulky shapes, texture  
882 properties, curvature patterns, or specific combinations of such features – that are  
883 represented/computed in the various object-type-preferring regions is an active, promising area of  
884 research (e.g., Andrews et al., 2010; Rajimehr et al., 2011; Bracci and Op de Beeck, 2016; Long,  
885 Yu and Konkle, 2018), aided by modeling with deep CNNs (e.g., Güçlü and Van Gerven, 2015;  
886 Khaligh-Razavi and Kriegeskorte, 2014; Yamins et al., 2014; Kubilius et al., 2016).

887

888

889

890

891

## 892 **Acknowledgments:**

893 This work was supported in part by a grant from the Fondazione Cassa di Risparmio di Trento e  
894 Rovereto to the CIMeC – Centro Interdipartimentale Mente/Cervello, University of Trento (AC)  
895 and by the National Institutes of Health, National Eye Institute (Fellowship F32EY022863-01A1  
896 to TK) and was conducted at the Laboratory for Functional Neuroimaging Center at the Center for  
897 Mind/Brain Sciences (CIMeC), University of Trento.

898

899           **REFERENCES**

- 900   Andrews, T. J., Clarke, A., Pell, P., & Hartley, T. (2010). Selectivity for low-level features of  
901       objects in the human ventral stream. *Neuroimage*, *49*(1), 703-711.
- 902   Ashburner, J., Barnes, G., Chen, C., Daunizeau, J., Flandin, G., Friston, K., ... & Penny, W. (2014).  
903       SPM12 manual. *Wellcome Trust Centre for Neuroimaging, London, UK*, 2464.
- 904   Auger, S. D., & Maguire, E. A. (2013). Assessing the mechanism of response in the retrosplenial  
905       cortex of good and poor navigators. *cortex*, *49*(10), 2904-2913.
- 906   Auger, S. D., Zeidman, P., & Maguire, E. A. (2015). A central role for the retrosplenial cortex in  
907       de novo environmental learning. *Elife*, *4*, e09031.
- 908   Bainbridge, W. A., & Oliva, A. (2015). Interaction envelope: Local spatial representations of  
909       objects at all scales in scene-selective regions. *Neuroimage*, *122*, 408-416.
- 910   Beauchamp MS (2005) See me, hear me, touch me: multisensory integration in lateral occipital-  
911       temporal cortex. *Current Opinion in Neurobiology* 15:145–153.
- 912   Bi, Y., Han, Z., Zhong, S., Ma, Y., Gong, G., Huang, R., ... & Caramazza, A. (2015). The white  
913       matter structural network underlying human tool use and tool understanding. *Journal of*  
914       *Neuroscience*, *35*(17), 6822-6835.
- 915   Boronat, C. B., Buxbaum, L. J., Coslett, H. B., Tang, K., Saffran, E. M., Kimberg, D. Y., & Detre,  
916       J. A. (2005). Distinctions between manipulation and function knowledge of objects: evidence  
917       from functional magnetic resonance imaging. *Cognitive Brain Research*, *23*(2-3), 361-373.
- 918   Bracci, S., Cavina-Pratesi, C., Ietswaart, M., Caramazza, A., & Peelen, M. V. (2012). Closely  
919       overlapping responses to tools and hands in left lateral occipitotemporal cortex. *Journal of*  
920       *neurophysiology*, *107*(5), 1443-1456.
- 921   Bracci, S., & Peelen, M. V. (2013). Body and object effectors: the organization of object  
922       representations in high-level visual cortex reflects body–object interactions. *Journal of*  
923       *Neuroscience*, *33*(46), 18247-18258.
- 924   Bracci, S., & de Beeck, H. O. (2016). Dissociations and associations between shape and category  
925       representations in the two visual pathways. *Journal of Neuroscience*, *36*(2), 432-444.
- 926   Brainard, D. H. (1997). The psychophysics toolbox. *Spatial vision*, *10*(4), 433-436.
- 927   Campanella, F., D’Agostini, S., Skrap, M., & Shallice, T. (2010). Naming manipulable objects:  
928       anatomy of a category specific effect in left temporal tumours. *Neuropsychologia*, *48*(6),  
929       1583-1597.

- 930 Brett, M., Anton, J. L., Valabregue, R., & Poline, J. B. (2002). Region of interest analysis using  
931 the MarsBar toolbox for SPM 99. *Neuroimage*, *16*(2), S497.
- 932 Caramazza, A., & Shelton, J. R. (1998). Domain-specific knowledge systems in the brain: The  
933 animate-inanimate distinction. *Journal of cognitive neuroscience*, *10*(1), 1-34.
- 934 Chao, L. L., Haxby, J. V., & Martin, A. (1999). Attribute-based neural substrates in temporal  
935 cortex for perceiving and knowing about objects. *Nature neuroscience*, *2*(10), 913-919.
- 936 Chen, Q., Garcea, F. E., & Mahon, B. Z. (2016). The representation of object-directed action and  
937 function knowledge in the human brain. *Cerebral Cortex*, *26*(4), 1609-1618.
- 938 Dilks, D. D., Julian, J. B., Paunov, A. M., & Kanwisher, N. (2013). The occipital place area is  
939 causally and selectively involved in scene perception. *Journal of Neuroscience*, *33*(4), 1331-  
940 1336.
- 941 Downing, P. E., Jiang, Y., Shuman, M., & Kanwisher, N. (2001). A cortical area selective for  
942 visual processing of the human body. *Science*, *293*(5539), 2470-2473.
- 943 Epstein, R., & Kanwisher, N. (1998). A cortical representation of the local visual  
944 environment. *Nature*, *392*(6676), 598-601.
- 945 Epstein RA (2008) Parahippocampal and retrosplenial contributions to human spatial navigation.  
946 *Trends in Cognitive Sciences* *12*:388–396.
- 947 Epstein, R. A., Bar, M., & Kveraga, K. (2014). Neural systems for visual scene recognition. *Scene*  
948 *vision*, 105-134.
- 949 Gallivan, J. P., McLean, D. A., Valyear, K. F., & Culham, J. C. (2013). Decoding the neural  
950 mechanisms of human tool use. *Elife*, *2*, e00425.
- 951 Goodale, M. A., & Milner, A. D. (1992). Separate visual pathways for perception and  
952 action. *Trends in neurosciences*, *15*(1), 20-25.
- 953 Grill-Spector K (2003) The neural basis of object perception. *Current Opinion in Neurobiology*  
954 *13*:159–166.
- 955 Grill-Spector, K., & Weiner, K. S. (2014). The functional architecture of the ventral temporal  
956 cortex and its role in categorization. *Nature reviews. Neuroscience*, *15*(8), 536.
- 957 Güçlü, U., & van Gerven, M. A. (2015). Deep neural networks reveal a gradient in the complexity  
958 of neural representations across the ventral stream. *Journal of Neuroscience*, *35*(27), 10005-  
959 10014.
- 960 He, C., Peelen, M. V., Han, Z., Lin, N., Caramazza, A., & Bi, Y. (2013). Selectivity for large



- 961 nonmanipulable objects in scene-selective visual cortex does not require visual  
962 experience. *Neuroimage*, 79, 1-9.
- 963 Horn JL (1965) A rationale and test for the number of factors in factor analysis. *Psychometrika*  
964 30:179–185.
- 965 Ishai, A., Ungerleider, L. G., Martin, A., Schouten, J. L., & Haxby, J. V. (1999). Distributed  
966 representation of objects in the human ventral visual pathway. *Proceedings of the National*  
967 *Academy of Sciences*, 96(16), 9379-9384.
- 968 Julian, J. B., Ryan, J., & Epstein, R. A. (2017). Coding of object size and object category in human  
969 visual cortex. *Cerebral Cortex*, 27(6), 3095-3109.
- 970 Kalénine, S., & Buxbaum, L. J. (2016). Thematic knowledge, artifact concepts, and the left  
971 posterior temporal lobe: Where action and object semantics converge. *Cortex*, 82, 164-178.
- 972 Kellenbach, M. L., Brett, M., & Patterson, K. (2003). Actions speak louder than functions: the  
973 importance of manipulability and action in tool representation. *Journal of cognitive*  
974 *neuroscience*, 15(1), 30-46.
- 975 Khaligh-Razavi, S. M., & Kriegeskorte, N. (2014). Deep supervised, but not unsupervised, models  
976 may explain IT cortical representation. *PLoS computational biology*, 10(11), e1003915.
- 977 Konkle, T., & Caramazza, A. (2013). Tripartite organization of the ventral stream by animacy and  
978 object size. *Journal of Neuroscience*, 33(25), 10235-10242.
- 979 Konkle, T., & Caramazza, A. (2017). The large-scale organization of object-responsive cortex is  
980 reflected in resting-state network architecture. *Cerebral cortex*, 27(10), 4933-4945.
- 981 Konkle, T., & Oliva, A. (2012). A real-world size organization of object responses in  
982 occipitotemporal cortex. *Neuron*, 74(6), 1114-112.
- 983 Kubilius, J., Bracci, S., & de Beeck, H. P. O. (2016). Deep neural networks as a computational  
984 model for human shape sensitivity. *PLoS computational biology*, 12(4), e1004896.
- 985 Lingnau, A., & Downing, P. E. (2015). The lateral occipitotemporal cortex in action. *Trends in*  
986 *Cognitive Sciences*, 19(5), 268–277. <https://doi.org/10.1016/j.tics.2015.03.006>
- 987 Long, B., Konkle, T., Cohen, M. A., & Alvarez, G. A. (2016). Mid-level perceptual features  
988 distinguish objects of different real-world sizes. *Journal of Experimental Psychology:*  
989 *General*, 145(1), 95.
- 990 Long, B., Yu, C. P., & Konkle, T. (2018). Mid-level visual features underlie the high-level  
991 categorical organization of the ventral stream. *Proceedings of the National Academy of*



- 992 *Sciences*, 115(38), E9015-E9024.
- 993 Macdonald, S. N., & Culham, J. C. (2015). Do human brain areas involved in visuomotor actions  
994 show a preference for real tools over visually similar non-tools?. *Neuropsychologia*, 77, 35-  
995 41.
- 996 Mahon, B. Z., Milleville, S. C., Negri, G. A., Rumiati, R. I., Caramazza, A., & Martin, A. (2007).  
997 Action-related properties shape object representations in the ventral stream. *Neuron*, 55(3),  
998 507-520.
- 999 Mattioni, S., Rezk, M., Battal, C., Bottini, R., Mendoza, K. E. C., Oosterhof, N. N., & Collignon,  
1000 O. (2020). Categorical representation from sound and sight in the ventral occipito-temporal  
1001 cortex of sighted and blind. *Elife*, 9, e50732.
- 1002 Mruczek, R. E., von Loga, I. S., & Kastner, S. (2013). The representation of tool and non-tool  
1003 object information in the human intraparietal sulcus. *Journal of Neurophysiology*, 109(12),  
1004 2883-2896.
- 1005 Mullally, S. L., & Maguire, E. A. (2011). A new role for the parahippocampal cortex in  
1006 representing space. *Journal of Neuroscience*, 31(20), 7441-7449.
- 1007 Peelen, M. V., Bracci, S., Lu, X., He, C., Caramazza, A., & Bi, Y. (2013). Tool selectivity in left  
1008 occipitotemporal cortex develops without vision. *Journal of cognitive neuroscience*, 25(8),  
1009 1225-1234.
- 1010 Perini, F., Caramazza, A., & Peelen, M. V. (2014). Left occipitotemporal cortex contributes to the  
1011 discrimination of tool-associated hand actions: fMRI and TMS evidence. *Frontiers in human*  
1012 *neuroscience*, 8.
- 1013 Proklova, D., Kaiser, D., & Peelen, M. V. (2016). Disentangling representations of object shape  
1014 and object category in human visual cortex: The animate–inanimate distinction. *Journal of*  
1015 *cognitive neuroscience*, 28(5), 680-692.
- 1016 Rajimehr, R., Devaney, K. J., Bilenko, N. Y., Young, J. C., & Tootell, R. B. (2011). The  
1017 “parahippocampal place area” responds preferentially to high spatial frequencies in humans  
1018 and monkeys. *PLoS Biol*, 9(4), e1000608.
- 1019 Simmons, W. K., & Martin, A. (2012). Spontaneous resting-state BOLD fluctuations reveal  
1020 persistent domain-specific neural networks. *Social Cognitive and Affective*  
1021 *Neuroscience*, 7(4), 467-475.
- 1022 Striem-Amit, E., Vannuscorps, G., & Caramazza, A. (2017). Sensorimotor-independent

- 1023            development of hands and tools selectivity in the visual cortex. *Proceedings of the National*  
1024            *Academy of Sciences*, 114(18), 4787-4792.
- 1025 Tarhan, L., & Konkle, T. (2020). Reliability-based voxel selection. *NeuroImage*, 207, 116350.
- 1026 Troiani, V., Stigliani, A., Smith, M. E., & Epstein, R. A. (2014). Multiple object properties drive  
1027            scene-selective regions. *Cerebral cortex*, 24(4), 883-897.
- 1028 Wang, X., Peelen, M. V., Han, Z., He, C., Caramazza, A., & Bi, Y. (2015). How visual is the visual  
1029            cortex? Comparing connectional and functional fingerprints between congenitally blind and  
1030            sighted individuals. *Journal of Neuroscience*, 35(36), 12545-12559.
- 1031 Wickham, H (2009). ggplot2: elegant graphics for data analysis. *Springer New York*, 1(2), 3.
- 1032 Yamins, D. L., Hong, H., Cadieu, C. F., Solomon, E. A., Seibert, D., & DiCarlo, J. J. (2014).  
1033            Performance-optimized hierarchical models predict neural responses in higher visual  
1034            cortex. *Proceedings of the National Academy of Sciences*, 111(23), 8619-8624.
- 1035
